# Supplementary material for: Indirect reciprocity with Bayesian reasoning and biases
Source: PubMed Central journal article supplement (PMC11045068; doi:10.1371/journal.pcbi.1011979), 2024-04-25

**A Staying optimism bias**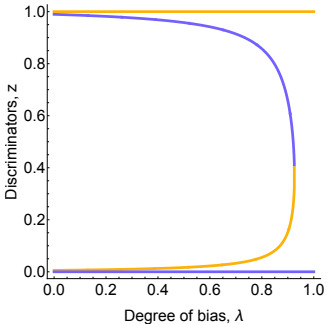**B Staying pessimism bias**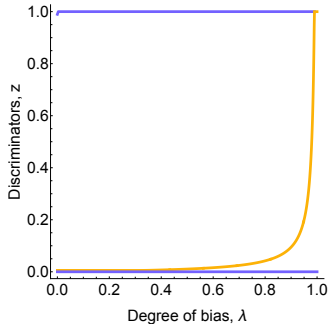**C Stern Judging optimism bias**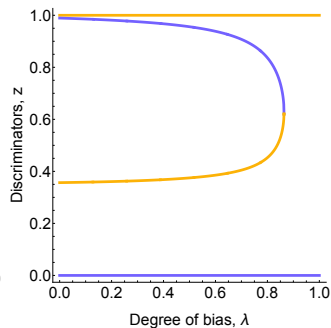**D Stern Judging pessimism bias**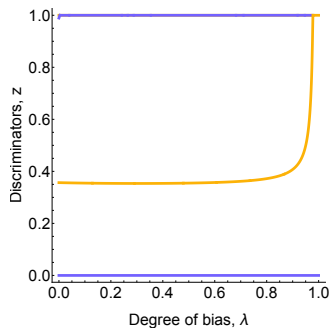

Supplement: pcbi.1011979.s003.pdf [file pcbi.1011979.s003.pdf]
