# Supplementary material for: Indirect reciprocity with Bayesian reasoning and biases
Source: PubMed Central journal article supplement (PMC11045068; doi:10.1371/journal.pcbi.1011979), 2024-04-25

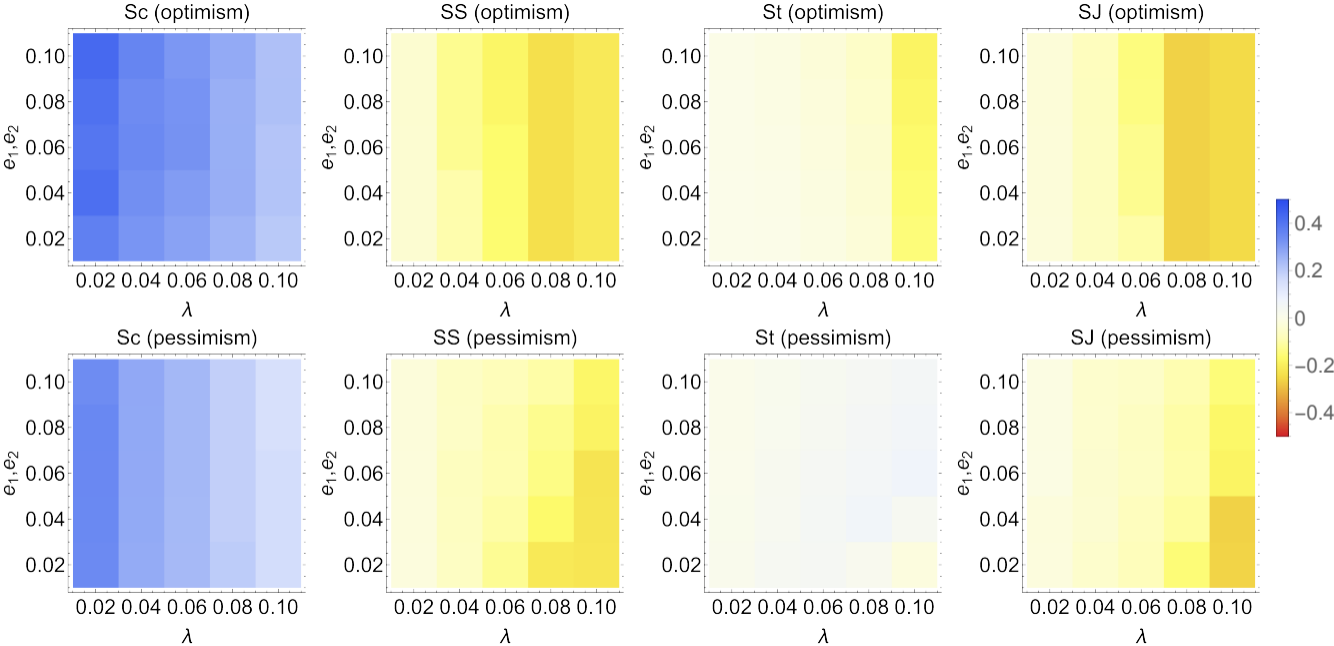

Supplement: pcbi.1011979.s004.pdf [file pcbi.1011979.s004.pdf]
