# Supplementary material for: Indirect reciprocity with Bayesian reasoning and biases
Source: PubMed Central journal article supplement (PMC11045068; doi:10.1371/journal.pcbi.1011979), 2024-04-25

**A Simple Standing with optimism**

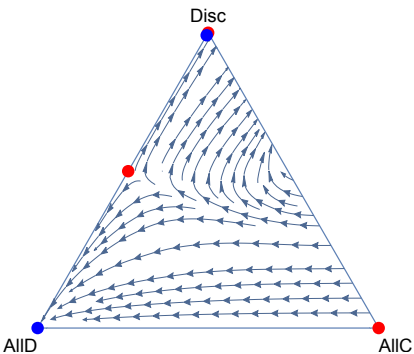

**B Staying with optimism**

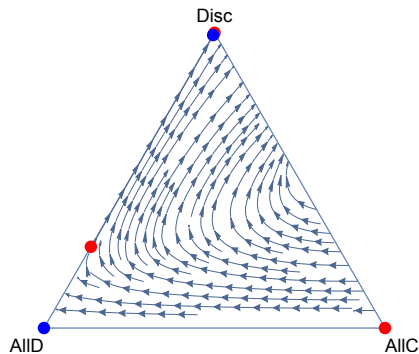

**C Stern Judging with optimism**

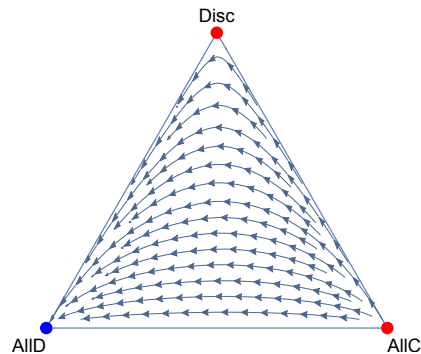

**D Simple Standing with pessimism**

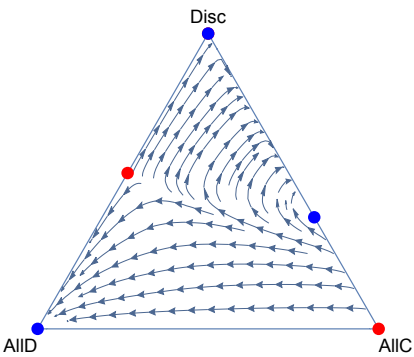

**E Staying with pessimism**

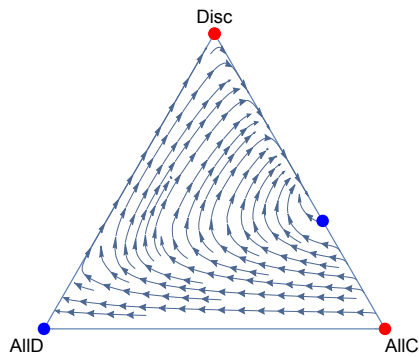

**F Stern Judging with pessimism**

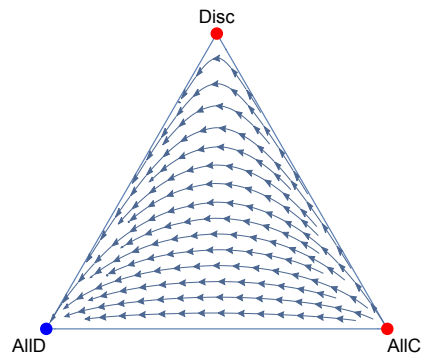

Supplement: pcbi.1011979.s005.pdf [file pcbi.1011979.s005.pdf]
