# Supplementary material for: Indirect reciprocity with Bayesian reasoning and biases
Source: PubMed Central journal article supplement (PMC11045068; doi:10.1371/journal.pcbi.1011979), 2024-04-25

SS (optimism)

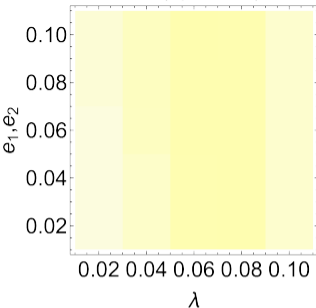

Staying (optimism)

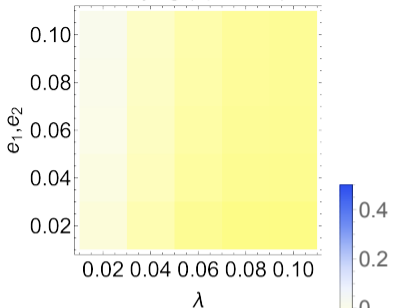

SS (pessimism)

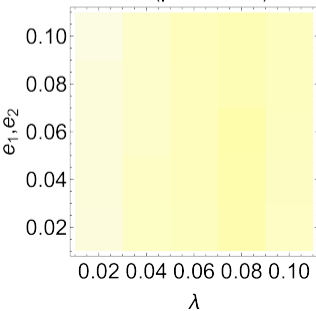

Staying (pessimism)

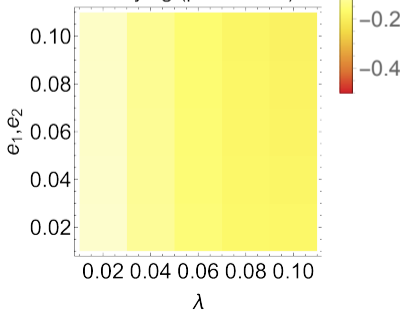

Supplement: pcbi.1011979.s006.pdf [file pcbi.1011979.s006.pdf]
